# Supplementary material for: The SPARK Tool to prioritise questions for systematic reviews in health policy and systems research: development and initial validation
Source: Springer Nature journal article supplement (doi:10.1186/s12961-017-0242-4), 2017-09-04
Supplement: MOESM1 [file 14976526]

### Additional file 1: Preliminary list of 19 candidate items along with their meanings

| Candidate items                                                                  | Meaning                                                                                                                                                               |
|----------------------------------------------------------------------------------|-----------------------------------------------------------------------------------------------------------------------------------------------------------------------|
| 1. Magnitude of the problem                                                      | What is the size of the problem?                                                                                                                                      |
| 2. Persistence of the problem                                                    | How persistent is the burden of the problem in question?                                                                                                              |
| 3. Community need/demand                                                         | How much does the topic respond to community concern or demand?                                                                                                       |
| 4. Responsiveness to the National Health Policy or national goals                | To what extent does the research question respond to the National Health Policy or national goals?                                                                    |
| 5. Relevance to decision-making                                                  | How relevant is the research topic to the needs of decision-makers                                                                                                    |
| 6. Urgency                                                                       | How urgent are the data needed for decision making?                                                                                                                   |
| 7. Ethical and moral issues                                                      | Is the planned research ethically and morally acceptable?                                                                                                             |
| 8. Political will/ acceptability/ commitment                                     | What is the likelihood that the results will be endorsed and supported by the competent policymakers?                                                                 |
| 9. Research utilization                                                          | What are the chances of the research outcome being implemented?                                                                                                       |
| 10. Applicability of the research                                                | What is the probability that the expected review outcome can be applied to inform decision-making?)                                                                   |
| 11. Equity focus                                                                 | How much does research in this area contribute to greater equity in health in socio-demographic terms, economic status, health service access/delivery, gender, etc.? |
| 12. Impact on health                                                             | What impact will this research have on the health of the population?                                                                                                  |
| 13. Impact on development                                                        | What impact will this have on the overall development of the country?                                                                                                 |
| 14. Adequacy and usefulness of the current knowledge base (avoiding duplication) | How adequate and useful is any available research-based information on this topic?                                                                                    |
| 15. Feasibility                                                                  | How feasible is the planned research, considering available resources?                                                                                                |
| 16. Capacity of the system to undertake the research                             | How adequate is the capacity of the system to undertake the research?                                                                                                 |
| 17. Operational effectiveness                                                    | How workable is the planned operation/management of the research?                                                                                                     |
| 18. Human rights issues                                                          | Is there a possibility that this research topic violates any human rights issue?                                                                                      |
| 19. Obligation and professional responsibility                                   | Are there any societal obligations and professional responsibilities for this problem?                                                                                |
