# Supplementary material for: The SPARK Tool to prioritise questions for systematic reviews in health policy and systems research: development and initial validation
Source: Springer Nature journal article supplement (doi:10.1186/s12961-017-0242-4), 2017-09-04
Supplement: MOESM2 [file 14976526]

**Additional file 2: Iterative refinements of the items and their wording through the development and validation process**

| <b>Original items and meanings</b>                                                                                                      | <b>Action</b> | <b>Revised items and meanings (based on step 3)</b>                                                                                                           | <b>→</b> | <b>Declarative statements (based on step 3)</b>                                               | <b>Action</b> | <b>Revised declarative statements (based on step 4)</b>                         | <b>Action</b> | <b>Final declarative statements (based on step 4)</b>                   |
|-----------------------------------------------------------------------------------------------------------------------------------------|---------------|---------------------------------------------------------------------------------------------------------------------------------------------------------------|----------|-----------------------------------------------------------------------------------------------|---------------|---------------------------------------------------------------------------------|---------------|-------------------------------------------------------------------------|
| <b>Magnitude of the problem</b><br>(What is the size of the problem?)                                                                   | None          | <b>Magnitude of the problem</b> (What is the size of the problem?)                                                                                            | →        | The problem is of large magnitude                                                             | Refined       | The problem is of large burden.                                                 | Refined       | Addressing this question responds to a problem that is of large burden. |
| <b>Persistence of the problem</b><br>(How persistent is the problem in question?)                                                       | None          | <b>Persistence of the problem</b> (How persistent is the problem in question?)                                                                                | →        | The problem is persistent                                                                     | None          | The problem is persistent                                                       | Refined       | Addressing this question responds to a problem that is persistent.      |
| <b>Community need/demand</b><br>(How well does the topic respond to community needs or demand)                                          | None          | <b>Community need/demand</b> (How well does the topic respond to community needs or demand?)                                                                  | →        | Acquiring the evidence for this question responds to community needs or demands               | Refined       | Addressing this question responds to the needs of the population                | None          | Addressing this question responds to the needs of the population.       |
| <b>Responsiveness to National Health Policy or national goals</b><br>(To what extent does the research question respond to the National | Refined       | <b>Responsiveness to national health policies or national goals</b> (To what extent does the question respond to national health policies or national goals?) | →        | Acquiring the evidence for this question responds to national health policy or national goals | Refined       | Addressing this question responds to national health policies or national goals | Refined       | Addressing this question responds to national health priorities.        |

|                                                                                                                 |         |                                                                                                               |   |                                                                                                 |         |                                                                                          |         |                                                                                      |
|-----------------------------------------------------------------------------------------------------------------|---------|---------------------------------------------------------------------------------------------------------------|---|-------------------------------------------------------------------------------------------------|---------|------------------------------------------------------------------------------------------|---------|--------------------------------------------------------------------------------------|
| Health Policy or national goals?)                                                                               |         |                                                                                                               |   |                                                                                                 |         |                                                                                          |         |                                                                                      |
| <b>Relevance to decision-makers</b><br>(How relevant is the research topic to the needs of decision-makers?)    | Merged  | <b>Responsiveness to decision-makers</b><br>(How responsive is the review topic to decision-makers' demands?) | → | The question is responsiveness to decision-makers' demands                                      | Refined | Addressing this question responds to decision-makers' concerns or demands.               | Refined | Addressing this question responds to the needs of decision-makers.                   |
| <b>Research utilization</b><br>(What is the probability that the expected research can inform decision-making?) |         |                                                                                                               |   |                                                                                                 |         |                                                                                          |         |                                                                                      |
| <b>Urgency</b> (How urgent is the data needed for decision making?)                                             | None    | <b>Urgency</b> (How urgent is the data needed for decision making?)                                           | → | Receiving the research evidence for this question is urgently needed to inform decision-making. | Merged  | Receiving the research evidence for this question is critical to inform decision-making. | Refined | Using the research evidence for this question is critical to inform decision-making. |
| <b>Applicability of the research</b><br>(What are the chances of the research                                   | Changed | <b>Criticality of the research</b> (How critical is the research to inform decision-making?)                  | → | Receiving the research evidence for this question is critical to inform decision-making.        |         |                                                                                          |         |                                                                                      |

|                                                                                                                                                      |         |                                                                                                                                                                                                |   |                                                                                                          |         |                                                                                                                |         |                                                                                                |
|------------------------------------------------------------------------------------------------------------------------------------------------------|---------|------------------------------------------------------------------------------------------------------------------------------------------------------------------------------------------------|---|----------------------------------------------------------------------------------------------------------|---------|----------------------------------------------------------------------------------------------------------------|---------|------------------------------------------------------------------------------------------------|
| outcome being implemented?)                                                                                                                          |         |                                                                                                                                                                                                |   |                                                                                                          |         |                                                                                                                |         |                                                                                                |
| <b>Ethical and moral issues</b> (Is the planned research ethically and morally acceptable?)                                                          | Changed | <b>Ethical and moral issues</b> (Are there ethical and moral obligations to use the research evidence for this question to                                                                     | → | There is an ethical and moral obligation to use the evidence for this question to inform decision-making | Refined | There is a moral obligation to use the research evidence for this question to inform decision-making.          | Refined | Addressing this question is a moral obligation.                                                |
| <b>Political will/ acceptability/ commitment</b> (What is the likelihood that the results will be endorsed and supported by policy makers?)          | None    | <b>Political will/ acceptability/ commitment</b> (What is the likelihood that the results will be endorsed and supported by policy makers?)                                                    | → | There is a political will to use the research evidence for this question to inform decision-making.      | None    | There is a political will to use the research evidence for this question to inform decision-making.            | Refined | Using the research evidence for this question is expected to be supported by political actors. |
| <b>Equity focus</b> ( How much does research in this area contribute to greater equity in health in socio-demographic terms, economic status, health | None    | <b>Equity focus</b> ( How much does a research in this area contribute to greater equity in health in socio-demographic terms, economic status, health service access/delivery, gender, etc.?) | → | Providing the evidence for this question is expected to have positive impact on equity in health.        | Refined | Acting upon the research evidence for this question is expected to have a positive impact on equity in health. | Refined | Addressing this question is expected to positively impact health equity.                       |

|                                                                                                            |         |                                                                                                                       |   |                                                                                                               |         |                                                                                                                                   |         |                                                                                                   |
|------------------------------------------------------------------------------------------------------------|---------|-----------------------------------------------------------------------------------------------------------------------|---|---------------------------------------------------------------------------------------------------------------|---------|-----------------------------------------------------------------------------------------------------------------------------------|---------|---------------------------------------------------------------------------------------------------|
| service access/delivery, gender, etc.?)                                                                    |         |                                                                                                                       |   |                                                                                                               |         |                                                                                                                                   |         |                                                                                                   |
| <b>Impact on health</b> (What impact will this research expected to have on the health of the population?) | Refined | <b>Impact on health</b> (What impact is this review expected to have on the health of the population?)                | → | Providing the evidence for this question is expected to have positive impact on the health of the population. | Refined | Acting upon the research evidence for this question is expected to have a positive impact on the health of the target population. | Refined | Addressing this question is expected to positively impact population health.                      |
| -                                                                                                          |         | -                                                                                                                     |   | -                                                                                                             | Added   | Acting upon the research evidence for this question is expected to have a positive impact on patient experience of care.          | Refined | Addressing this question is expected to positively impact patient experience of care.             |
| -                                                                                                          | Added   | <b>Cost justification</b> (Is the review likely to have positive impact on health expenditures?)                      | → | Providing the evidence for this question is expected to have positive impact on health expenditures.          | Refined | Acting upon the research evidence for this question is expected to have a positive impact on health care expenditures.            | Refined | Addressing this question is expected to positively impact health care expenditures.               |
| <b>Impact on development</b> (What impact will this have on the overall                                    | Refined | <b>Impact on development</b> (What impact is this review expected to have on the overall development of the country?) | → | Providing the evidence for this question is expected to have positive impact on the overall                   | Refined | Acting upon the research evidence for this question is expected to have a positive impact on the overall                          | Refined | Addressing this question is expected to positively impact the overall development of the country. |

|                                                                                                                                                   |                |                                                                                                                                                                                                                                                                            |   |                                                                                                            |         |                                                                                                            |         |                                                                               |
|---------------------------------------------------------------------------------------------------------------------------------------------------|----------------|----------------------------------------------------------------------------------------------------------------------------------------------------------------------------------------------------------------------------------------------------------------------------|---|------------------------------------------------------------------------------------------------------------|---------|------------------------------------------------------------------------------------------------------------|---------|-------------------------------------------------------------------------------|
| development of the country?)                                                                                                                      |                |                                                                                                                                                                                                                                                                            |   | development of the country.                                                                                |         | development of the country.                                                                                |         |                                                                               |
| <b>Adequacy and usefulness of the current knowledge base</b> (How adequate and useful is any available research-based information on this topic?) | Split into two | <b>Availability of adequate primary data</b> (How likely is it that the review question can be answered given the current state of science and the size of the gap in knowledge?)                                                                                          | → | A systematic review on this question can be answered given the availability of primary studies.            | Refined | Primary studies are available for inclusion in the systematic review.                                      | None    | Primary studies are available for inclusion in the systematic review.         |
|                                                                                                                                                   |                | <b>Availability of adequate systematic reviews to avoid duplication</b> (How adequate is any available systematic review on this topic? Here, adequate refers to the presence of up-to-date and well-conducted systematic reviews addressing the specific review question) | → | There are no available or adequate (i.e. up-to-date and high quality) systematic reviews on this question. | None    | There are no available or adequate (i.e. up-to-date and high quality) systematic reviews on this question. | Refined | There are no available or adequate systematic reviews on this question.       |
| -                                                                                                                                                 | Added          | <b>Translation of policy problem into a reviewable question</b> (Is the issue amenable to a significant number of                                                                                                                                                          | → | The question can be translated into an answerable systematic review question                               | None    | The question can be translated into an answerable systematic review question.                              | None    | The question can be translated into an answerable systematic review question. |

|                                                                                                                                                                                                                  |         |                                                                                                       |   |                                                                                    |      |                                                                                     |      |                                                                                     |
|------------------------------------------------------------------------------------------------------------------------------------------------------------------------------------------------------------------|---------|-------------------------------------------------------------------------------------------------------|---|------------------------------------------------------------------------------------|------|-------------------------------------------------------------------------------------|------|-------------------------------------------------------------------------------------|
|                                                                                                                                                                                                                  |         | feasible and generalizable review questions)                                                          |   |                                                                                    |      |                                                                                     |      |                                                                                     |
| <b>Feasibility</b><br>(How feasible is the planned research, considering available resources?)                                                                                                                   | Changed | <b>Feasibility</b> (How feasible is the planned research, considering the expected timeframe?)        | → | The systematic review is feasible within the expected timeframe.                   | None | The systematic review is feasible within the expected timeframe.                    | None | The systematic review is feasible within the expected timeframe.                    |
| <b>Capacity of the system to undertake the research</b> (How adequate is the capacity of the system to undertake the research in terms of competency, infrastructure, support system, mechanisms and resources?) | Refined | <b>Capacity to undertake the review</b> (How adequate is the human capacity to undertake the review?) | → | There is adequate human capacity to undertake the systematic review                | None | There is adequate human capacity to undertake the systematic review                 | None | There is adequate human capacity to undertake the systematic review                 |
| <b>Operational effectiveness</b><br>(How workable is the planned operation/management of the research?)                                                                                                          | None    | <b>Operational effectiveness</b> (How workable is the planned operation/management of the research?)  | → | There is adequate operation/management capacity to undertake the systematic review | None | There is adequate operation/management capacity to undertake the systematic review. | None | There is adequate operation/management capacity to undertake the systematic review. |
| -                                                                                                                                                                                                                | Added   | <b>Contribution to capacity</b>                                                                       | → | Conducting the systematic review                                                   | None | Conducting the systematic review                                                    | None | Conducting the systematic review                                                    |

|                                                                                                                                                        |         |                                                                                                                           |   |                                                                                          |         |                                                                       |      |                                                                       |
|--------------------------------------------------------------------------------------------------------------------------------------------------------|---------|---------------------------------------------------------------------------------------------------------------------------|---|------------------------------------------------------------------------------------------|---------|-----------------------------------------------------------------------|------|-----------------------------------------------------------------------|
|                                                                                                                                                        |         | <b>strengthening</b> (How likely is the planned research to contribute to sustainable capacity to conduct future reviews) |   | contributes to sustainable capacity to conduct future reviews.                           |         | contributes to sustainable capacity to conduct future reviews.        |      | contributes to sustainable capacity to conduct future reviews.        |
| <b>Human rights issues</b> (Is there a possibility that this research topic violates any human rights issue?)                                          | Refined | <b>Human rights issues</b> (What human rights concerns are raised by attempts to research in this area?)                  | → | Conducting a systematic review on this question does not raise any human rights concerns | Refined | Conducting the systematic review does not raise any ethical concerns. | None | Conducting the systematic review does not raise any ethical concerns. |
| <b>Obligation and professional responsibility</b> (Are there any societal obligations and professional responsibilities for conducting this research?) | Refined | <b>Social responsibility</b> (Are there any societal responsibility for conducting this research?)                        | → | Conducting the systematic review is a social responsibility.                             | None    | Conducting the systematic review is a social responsibility.          | None | Conducting the systematic review is a social responsibility.          |
